# Supplementary material for: Attenuation of Nonsense-Mediated mRNA Decay Enhances In Vivo Nonsense Suppression
Source: PubMed Central journal article supplement (PMC3622682; doi:10.1371/journal.pone.0060478), 2013-04-10
Supplement: pone.0060478.s007.pdf [file pone.0060478.s007.pdf]

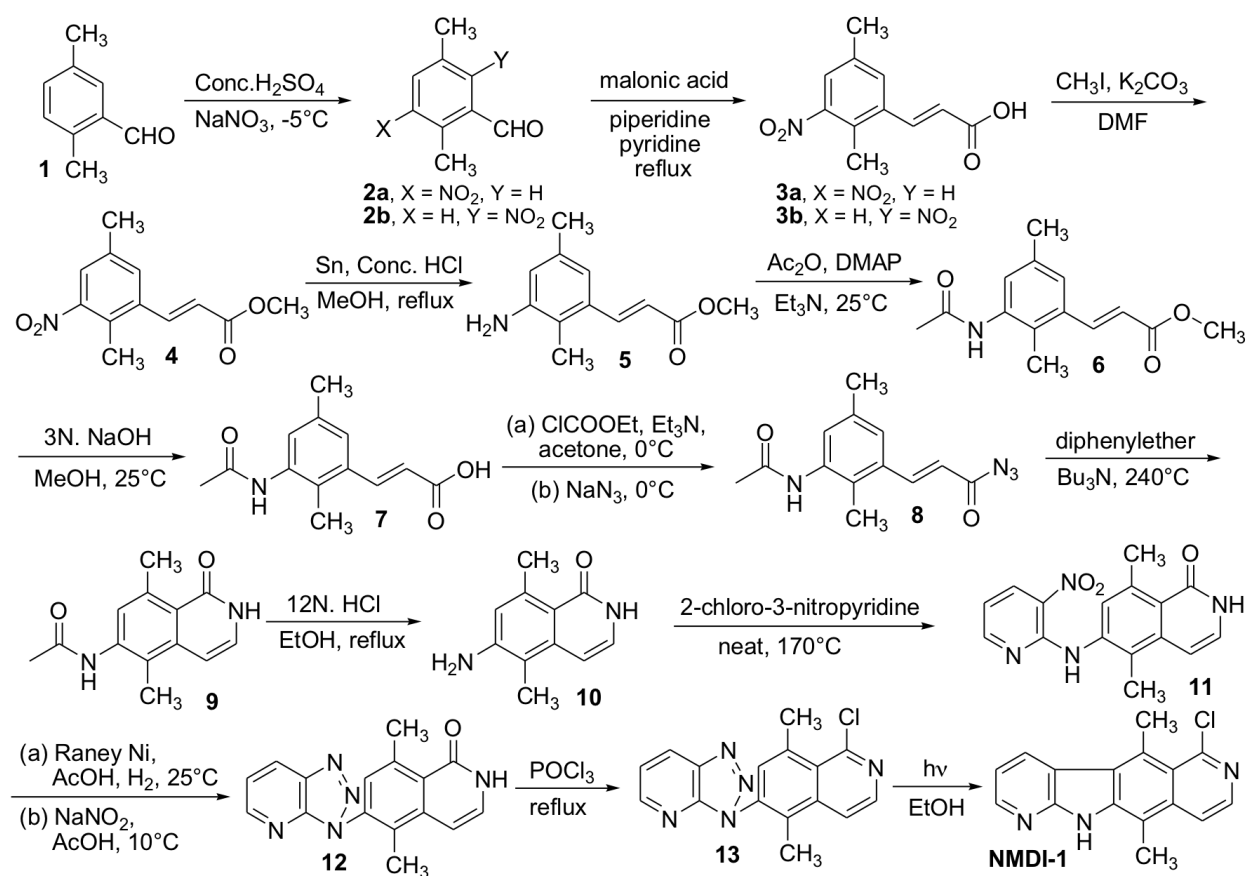

Figure S7
